# Supplementary material for: Heart-Cutting Bidimensional Liquid Chromatography for the Simultaneous Analysis of Veterinary Drugs Residues and Nucleotide Monophosphates in Sheep’s Milk
Source: MDPI journal article supplement (doi:10.3390/foods13060872), 2024-03-13
Supplement: s1 [file s1]

**Table S1**

Chromatographic methods tested. Solvent A: formic acid (pH: 3), Solvent B: acetonitrile.  
Injection volume: 50  $\mu\text{L}$  and flow rate: 0.2 mL min<sup>-1</sup>.

|                                      | Time (min) | Solvent B (%) |
|--------------------------------------|------------|---------------|
| <b>Gradient elution<br/>method 1</b> | 0          | 20            |
|                                      | 7.5        | 20            |
|                                      | 8          | 30            |
|                                      | 18         | 30            |
|                                      | 19         | 90            |
|                                      | 26         | 90            |
|                                      | 30         | 20            |
| <b>Gradient elution<br/>method 2</b> | 0          | 10            |
|                                      | 5          | 20            |
|                                      | 9          | 20            |
|                                      | 12         | 90            |
|                                      | 15         | 90            |
|                                      | 15.5       | 10            |
|                                      | 20         | 10            |
| <b>Gradient elution<br/>method 3</b> | 0          | 10            |
|                                      | 5          | 15            |
|                                      | 5.5        | 20            |
|                                      | 8          | 20            |
|                                      | 10         | 90            |
|                                      | 12         | 90            |
|                                      | 12.5       | 10            |
|                                      | 20         | 10            |

**Table S2**

Chemical structure, ionization constant, octanol–water partition coefficient and number of proton donors and acceptors for the veterinary drugs and monophosphate nucleotides.

| Compound name                                   | Structure                                                                           | MW <sup>a</sup> (g/mol) <sup>b</sup> | pK <sub>a</sub> <sup>b</sup> | Log P <sup>b</sup> | Hydrogen Donors/Acceptors <sup>c</sup> |
|-------------------------------------------------|-------------------------------------------------------------------------------------|--------------------------------------|------------------------------|--------------------|----------------------------------------|
| Trimethoprim (TMP)                              | 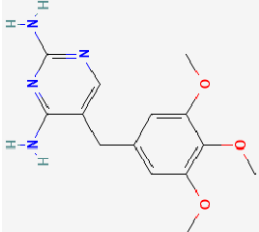   | 290.32                               | 7.04                         | 0.594              | 2/7                                    |
| Albendazole 2-amino sulfone (ANH <sub>2</sub> ) |    | 239.30                               | 9.90                         | 0.858              | 2/4                                    |
| Enrofloxacin (ERF)                              |    | 359.4                                | 6.43                         | 2.306              | 1/7                                    |
| Ciprofloxacin (CPF)                             |  | 331.34                               | 6.43                         | 1.625              | 2/7                                    |
| Albendazole sulfoxide (ASO)                     |  | 281.33                               | 10.05                        | 0.676              | 2/5                                    |

|                                               |                                                                                    |        |       |        |      |
|-----------------------------------------------|------------------------------------------------------------------------------------|--------|-------|--------|------|
| Albendazole sulfone (ASO <sub>2</sub> )       | 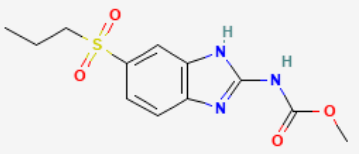  | 297.33 | 10.11 | 1.227  | 2/5  |
| Cytidine 5'-monophosphate (CMP) <sup>c</sup>  |   | 367.16 | 1.86  | -5.134 | 3/8  |
| Adenosine 5'-monophosphate (AMP) <sup>c</sup> |   | 391.19 | 1.86  | -3.190 | 3/11 |
| Inosine 5'-monophosphate (IMP) <sup>c</sup>   |  | 392.17 | 1.86  | -4.227 | 3/10 |

|                                  |                                                                                   |        |      |        |      |
|----------------------------------|-----------------------------------------------------------------------------------|--------|------|--------|------|
| Uridine 5'-monophosphate (UMP)   | 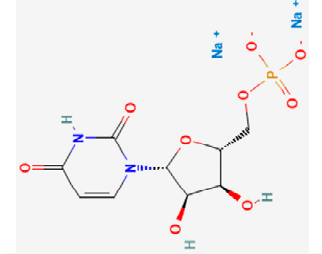 | 368.14 | 1.86 | -3.452 | 3/9  |
| Guanosine 5'-monophosphate (GMP) |  | 407.18 | 1.86 | -4.067 | 4/10 |

Mw: molecular weight. <sup>b</sup>: Calculated using Advanced Chemistry Development (ACD/Labs) Software V11.02 (© 1994-2023 ACD/Labs).

<sup>c</sup>: Data obtained from PubChem (<https://pubchem.ncbi.nlm.nih.gov/>)

**Table S3**

Chromatographic methods tested. Solvent A: H<sub>2</sub>O/Acetonitrile (98/2 %, v/v) + 30mM sodium acetate, pH: 4.5. Solvent B: H<sub>2</sub>O/Acetonitrile (98/10 %, v/v) + 60mM sodium acetate, pH: 4.5. Volume of elution fraction from 1D: 40 µL and flow rate: 0.2 mL min<sup>-1</sup>.

|                                       | Time (min) | Solvent B (%) |
|---------------------------------------|------------|---------------|
| <b>Gradient elution<br/>method 1</b>  | 0          | 0             |
|                                       | 12         | 100           |
|                                       | 16         | 100           |
|                                       | 20         | 0             |
| <b>Gradient elution<br/>method 2</b>  | 0          | 95            |
|                                       | 15         | 100           |
|                                       | 20         | 100           |
|                                       | 20.5       | 95            |
|                                       | 30         | 95            |
| <b>Isocratic elution<br/>method 3</b> | 0          | 100           |
|                                       | 20         | 100           |
